# Supplementary material for: Polymerization kinetics of bicyclic olefins and mechanism with symmetrical ansa-metallocene catalysts associated with active center count: relationship between their activities and structure and activation path
Source: Royal Society of Chemistry journal article supplement (doi:10.1039/d2ra01264b), 2022-01-01
Supplement: d2ra01264b1.pdf [file d2ra01264b1.pdf]

*Submitted to RSC Advances*

**Bicyclic olefins polymerization kinetic and Mechanism with symmetrical ansa-metallocene catalysts associative with Active Centers count: Relationships between Activities and their Structure and Activation path**

Amjad Ali<sup>1,6</sup>, Ahmad Naveed<sup>1</sup>, Khurram Shehzad<sup>2\*</sup>, Tariq Aziz<sup>3</sup>, Tahir Rasheed<sup>4</sup>, Jamile Mohammadi Moradian<sup>5</sup>, Mobashar Hassan<sup>1</sup>, Abdul Rahman<sup>2</sup>, Fan Zhiqiang<sup>6</sup>, Li Guo<sup>1\*</sup>

<sup>1</sup>Research School of Polymeric Materials, School of Materials Science & Engineering, Jiangsu University, Zhenjiang, 212013, P.R China.

<sup>2</sup>School of Micro-Nano Electronics, Hangzhou Global Scientific and Technological Innovation Center (HIC), Zhejiang University, Xiaoshan 311200, China; State Key Laboratory of Silicon Materials, Zhejiang University, Hangzhou 310027, China; ZJU-UIUC Joint Institute, Zhejiang University, Jiaxing 314400, China.

<sup>3</sup>Westlake University, School of Engineering Yunqi Campus, Hangzhou, Zhejiang 310024 PR China.

<sup>4</sup>Interdisciplinary Research Center for Advanced Materials, King Fahd University of Petroleum and Minerals (KFUPM), Dhahran 31261, Saudi Arabia.

<sup>5</sup>Biofuels institute, School of Environment, Jiangsu University, Zhenjiang, 212013, P.R China.

<sup>6</sup>MOE Key Laboratory of Macromolecular Synthesis and Functionalization, Department of Polymer Science and Engineering, Zhejiang University, Hangzhou, 310027, P.R. China.

**\*Corresponding author:** E-mail address [khurrams@zju.edu.cn](mailto:khurrams@zju.edu.cn) (K. Shehzad);

[liguo@ujs.edu.cn](mailto:liguo@ujs.edu.cn) (Li Guo).

## Supporting information

| RUN | Time<br>see | VNB<br>In polymer | VNB in Pol<br>wt% | mol <sub>VNB</sub> /mol <sub>cat</sub> | $R_p^{ENB}$ /mol <sub>cat</sub><br>molVNB/molcat s | *C<br>% | [VNB]<br>mol/L | kp VNB<br>L/mol s |
|-----|-------------|-------------------|-------------------|----------------------------------------|----------------------------------------------------|---------|----------------|-------------------|
| 1.1 | 120         | 10.92             | 0.345             | 298                                    | 0.7                                                | 5.71    | 0.0525         | 233               |
| 1.2 | 240         | 9.33              | 0.306             | 347                                    | 0.67                                               | 7.55    | 0.0513         | 173               |
| 1.3 | 360         | 8.46              | 0.284             | 416                                    | 0.58                                               | 10.1    | 0.0496         | 116               |
| 1.4 | 480         | 8.05              | 0.273             | 527                                    | 0.52                                               | 14.08   | 0.0468         | 78.9              |
| 1.5 | 840         | 7.85              | 0.268             | 659                                    | 0.36                                               | 19.68   | 0.0435         | 42.04             |
| 1.6 | 1200        | 7.22              | 0.250             | 767                                    | 0.25                                               | 26.17   | 0.0408         | 23.395            |
| 1.7 | 1500        | 7.09              | 0.247             | 870                                    | 0.18                                               | 29.93   | 0.0382         | 15.727            |
| 1.8 | 1800        | 5.73              | 0.207             | 868                                    | 0.14                                               | 31.67   | 0.0383         | 11.5397           |

**Table S1** Calculation of  $R_p^{VNB}$  and  $K_p^{VNB}$  in the ethylene-VNB copolymerization.

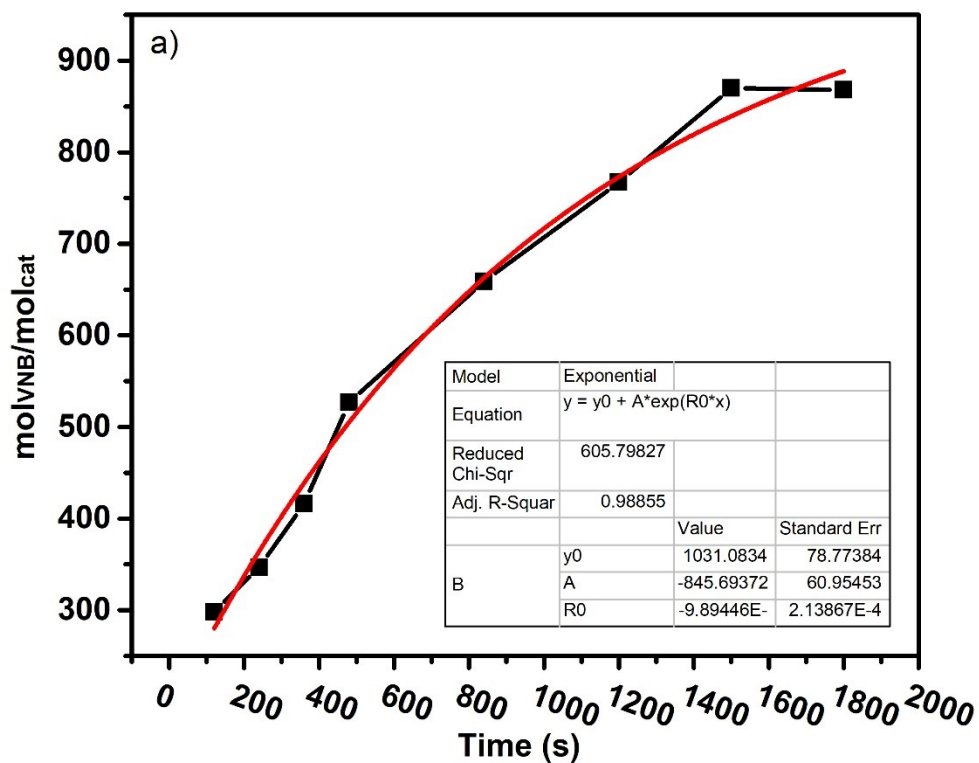

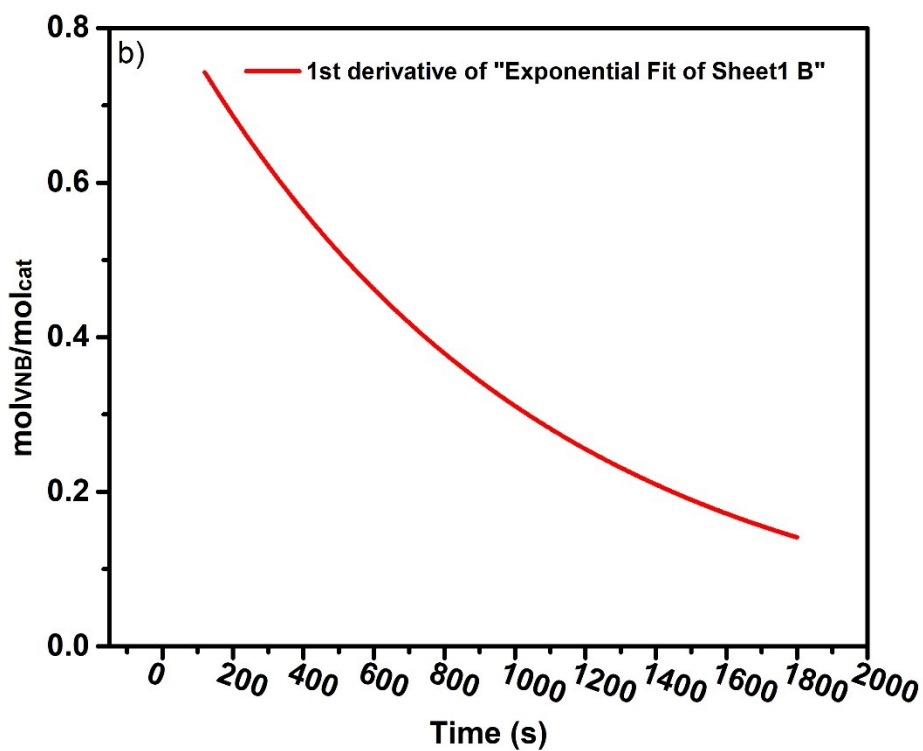

**Figure S1.** The plot of  $\text{mol}_{\text{VNB}}/\text{mol}_{\text{cat}}$  vs. time, and Differentiate.

**Table S2.** Calculation of  $R_p^E$  and  $K_p^E$  in the ethylene-VNB copolymerization.

| RUN | Time<br>see | VNB<br>In polymer | VNB in Pol<br>wt% | *C<br>% | mE<br>g | $\text{mol}_E/\text{mol}_{\text{cat}}$ | $R_p^E$<br>$\text{molE}/\text{molcat s}$ | $k_p^E$<br>L/mol s |
|-----|-------------|-------------------|-------------------|---------|---------|----------------------------------------|------------------------------------------|--------------------|
| 1.1 | 120         | 10.92             | 0.345             | 5.71    | 0.129   | 3686                                   | 10.23                                    | 4266               |
| 1.2 | 240         | 9.33              | 0.306             | 7.55    | 0.169   | 4829                                   | 9.87                                     | 3113               |
| 1.3 | 360         | 8.46              | 0.284             | 10.1    | 0.218   | 6229                                   | 9.52                                     | 2244               |
| 1.4 | 480         | 8.05              | 0.273             | 14.08   | 0.288   | 8229                                   | 9.18                                     | 1552               |
| 1.5 | 840         | 7.85              | 0.268             | 19.68   | 0.367   | 10486                                  | 8.25                                     | 998                |
| 1.6 | 1200        | 7.22              | 0.250             | 26.17   | 0.456   | 13029                                  | 7.41                                     | 674                |
| 1.7 | 1500        | 7.09              | 0.247             | 29.93   | 0.525   | 15000                                  | 6.77                                     | 539                |
| 1.8 | 1800        | 5.73              | 0.207             | 31.67   | 0.624   | 17829                                  | 6.19                                     | 465                |

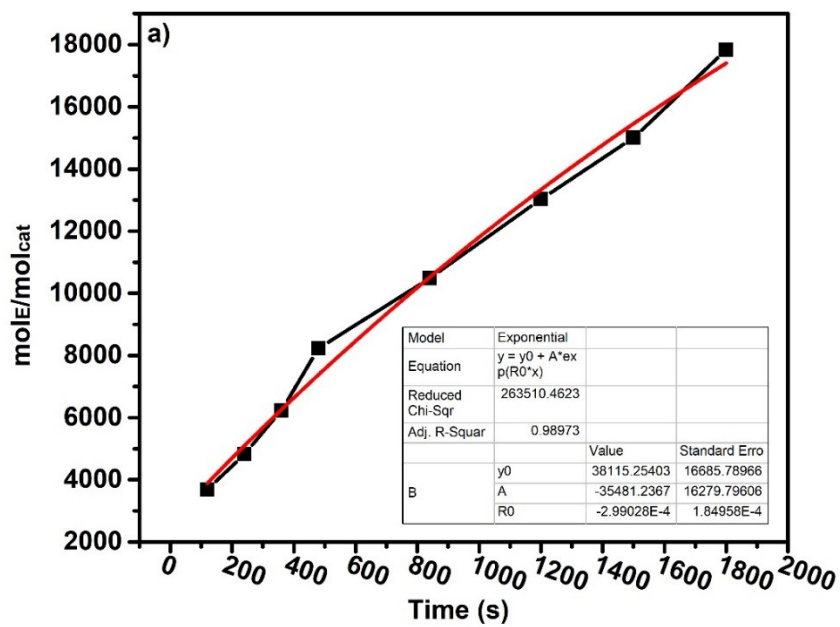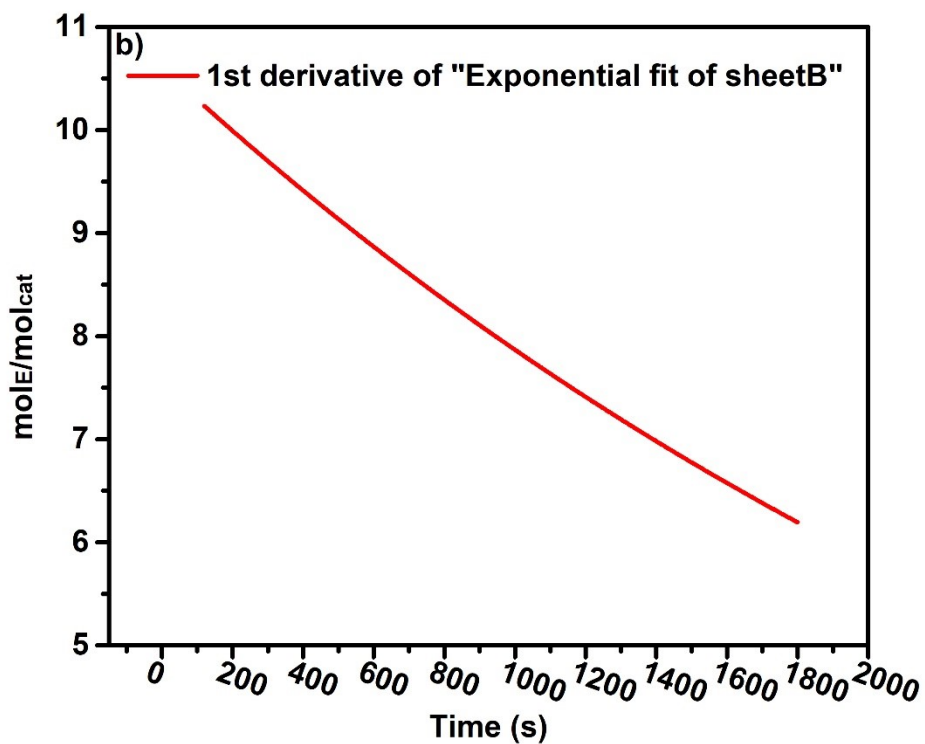

Figure S2. Plot of  $\text{mol}_{\text{VNB}}/\text{mol}_{\text{cat}}$  vs time, and Differentiate.

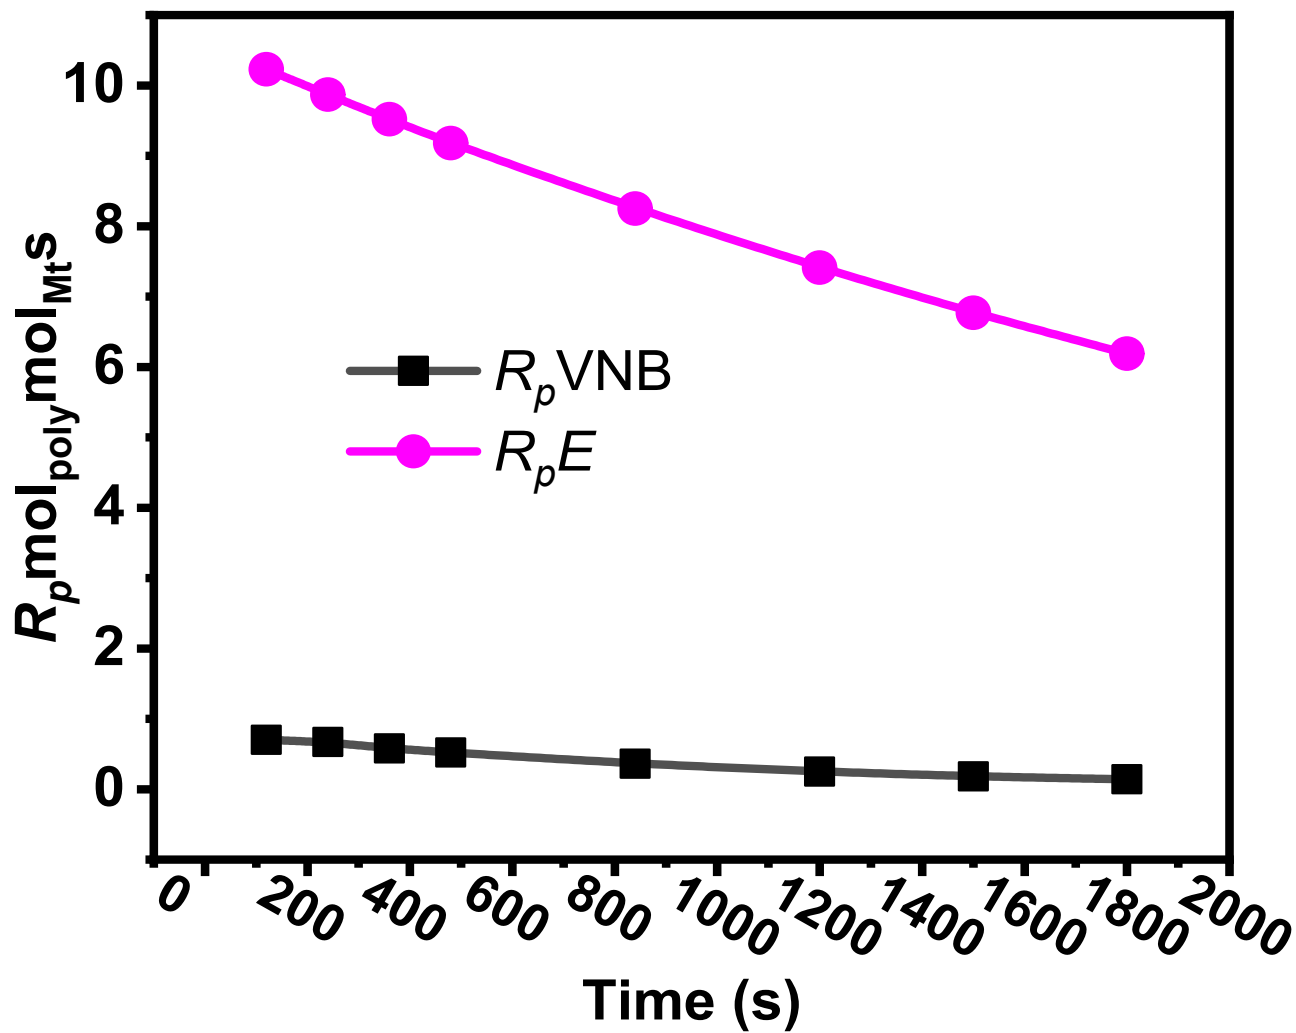

Figure S3. Variation of chain propagation rate  $R_p E$  and  $k_p VNB$  with polymerization time ( $t_p$ ) in E/VNB copolymerization.

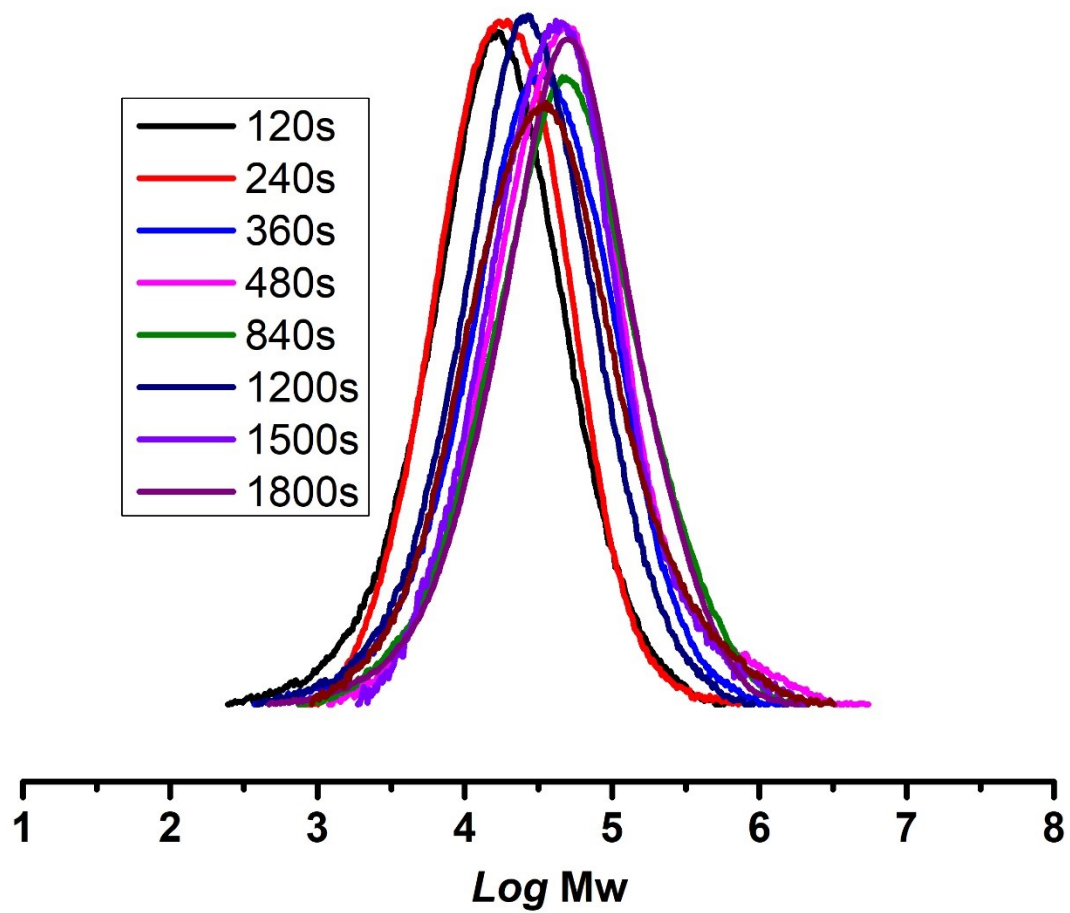

**Figure S4** Molecular weight distribution of E-VNB copolymers with polymerization time.

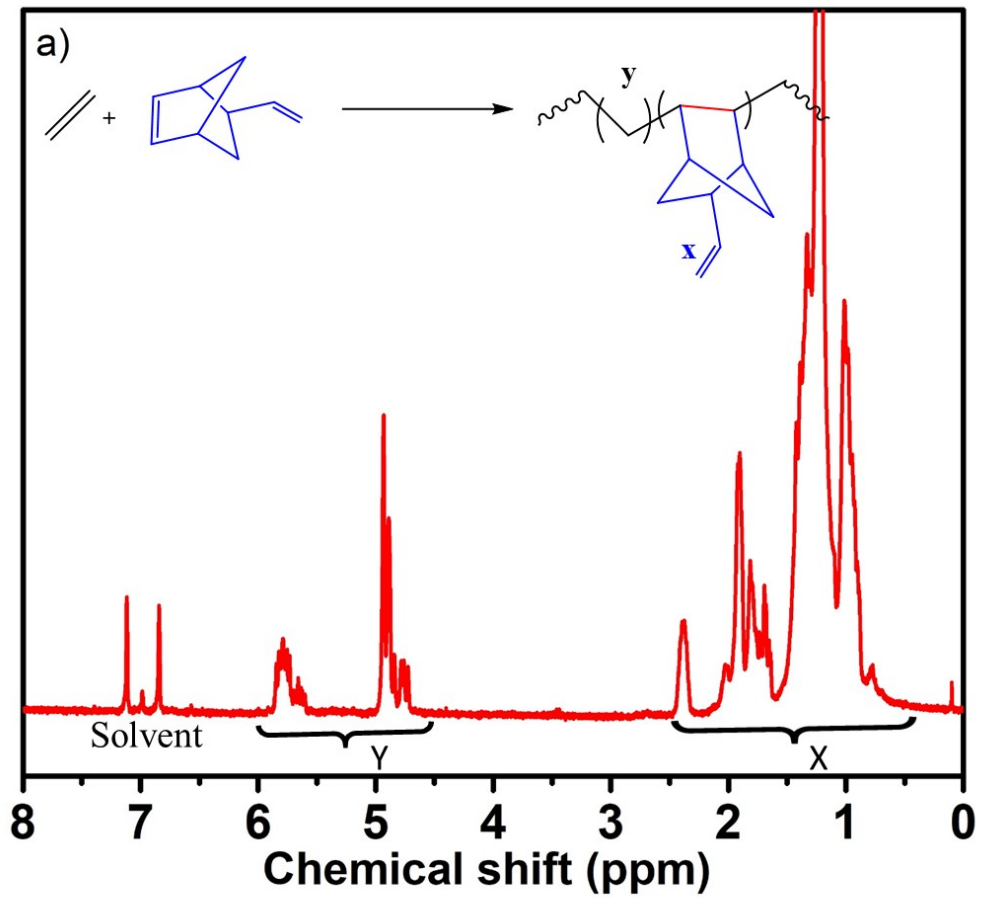

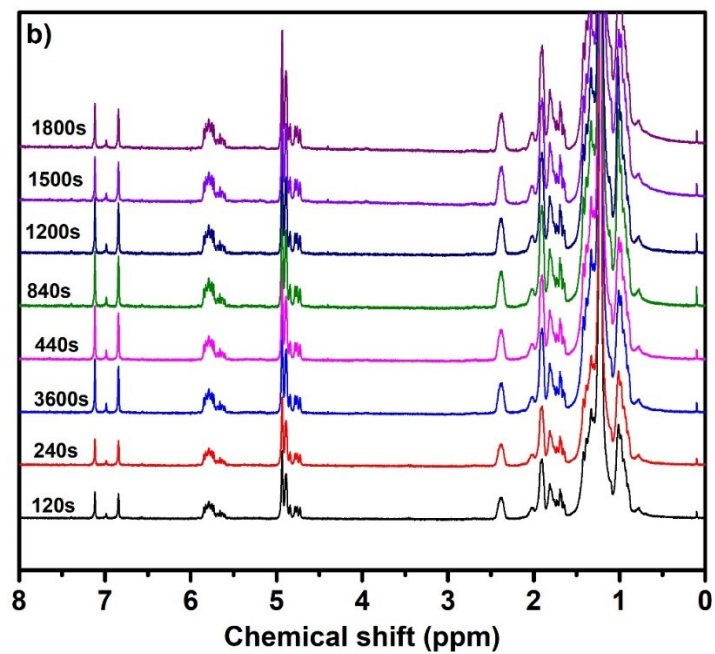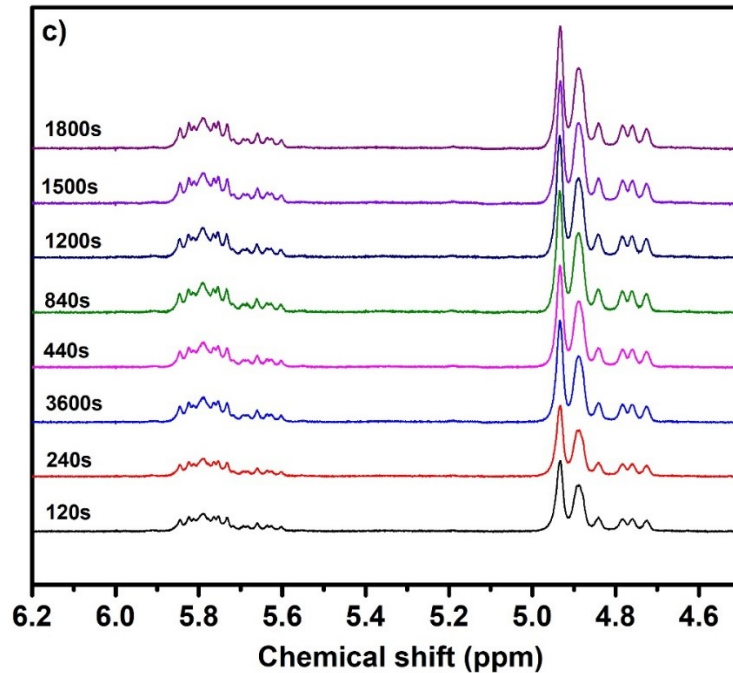

Figure S5 <sup>1</sup>H NMR of E-ENB copolymers with polymerization time.



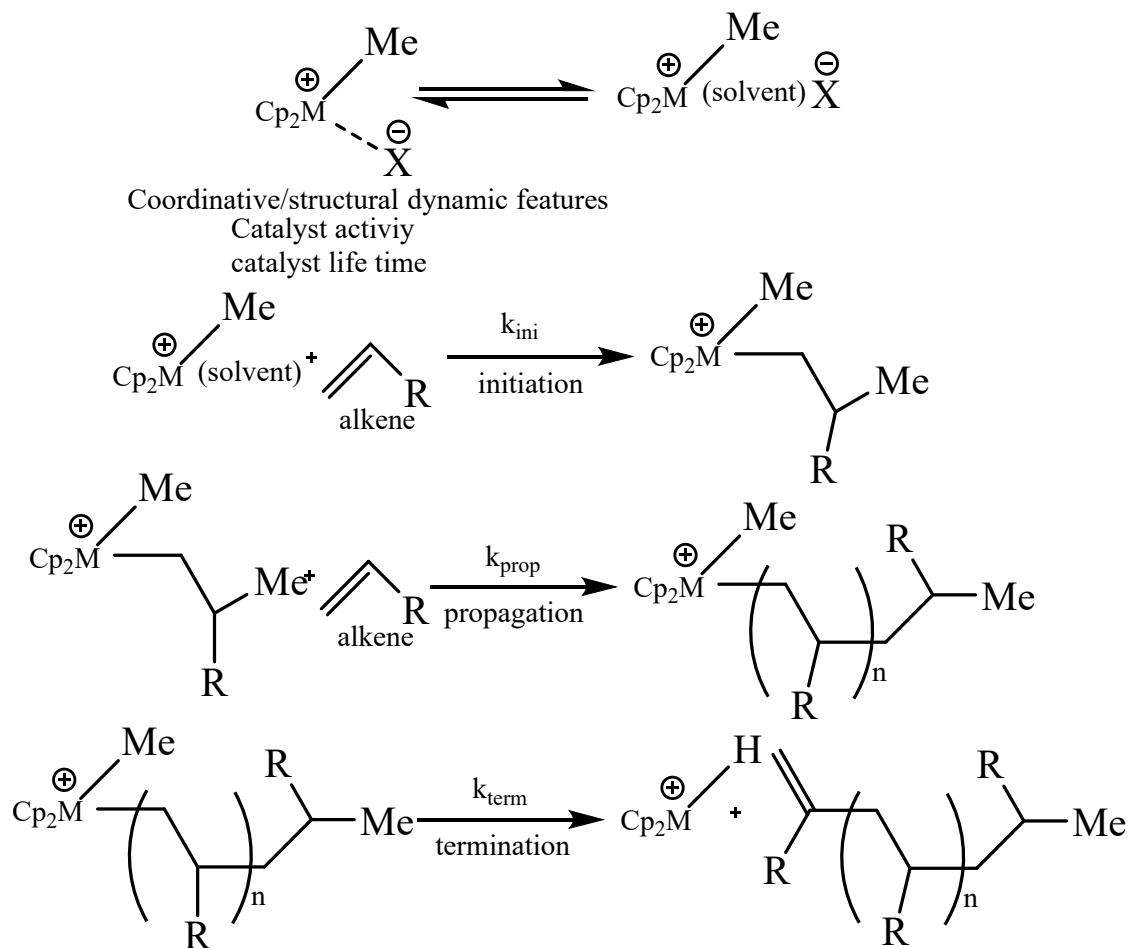

Scheme 1. [20]

**Scheme 1** is a simple example of how metallocene-catalyzed polymerization of alkenes might work.

It emerged from the work of Richardson, Guo, and Siedle et al.

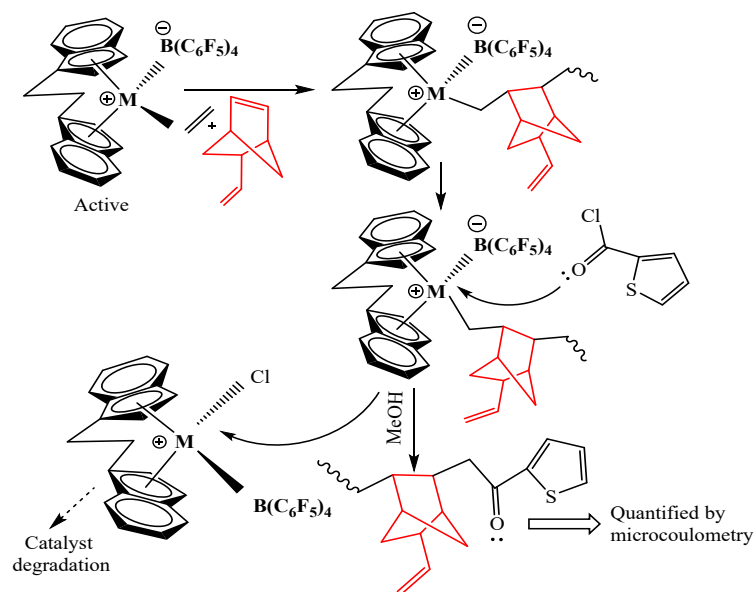

**Scheme S2.** TPPC quenched active sites calculated through sulfur (S) content using A YHTS-2000 ultra-violet fluorescence sulfur detector for *rac*-Et(Ind)<sub>2</sub>ZrCl<sub>2</sub> catalyzed E/VNB copolymers.
